# Supplementary material for: 2037 曲げモーメントを受ける両面隅肉溶接継目の力学性状に関する研究 : 前面T形両面隅肉溶接継目の最大耐力と破壊機構(構造)
Source: PLOS journal article supplement (doi:10.1371/journal.pone.0047740), 2009-03-28

Supporting Figure S1

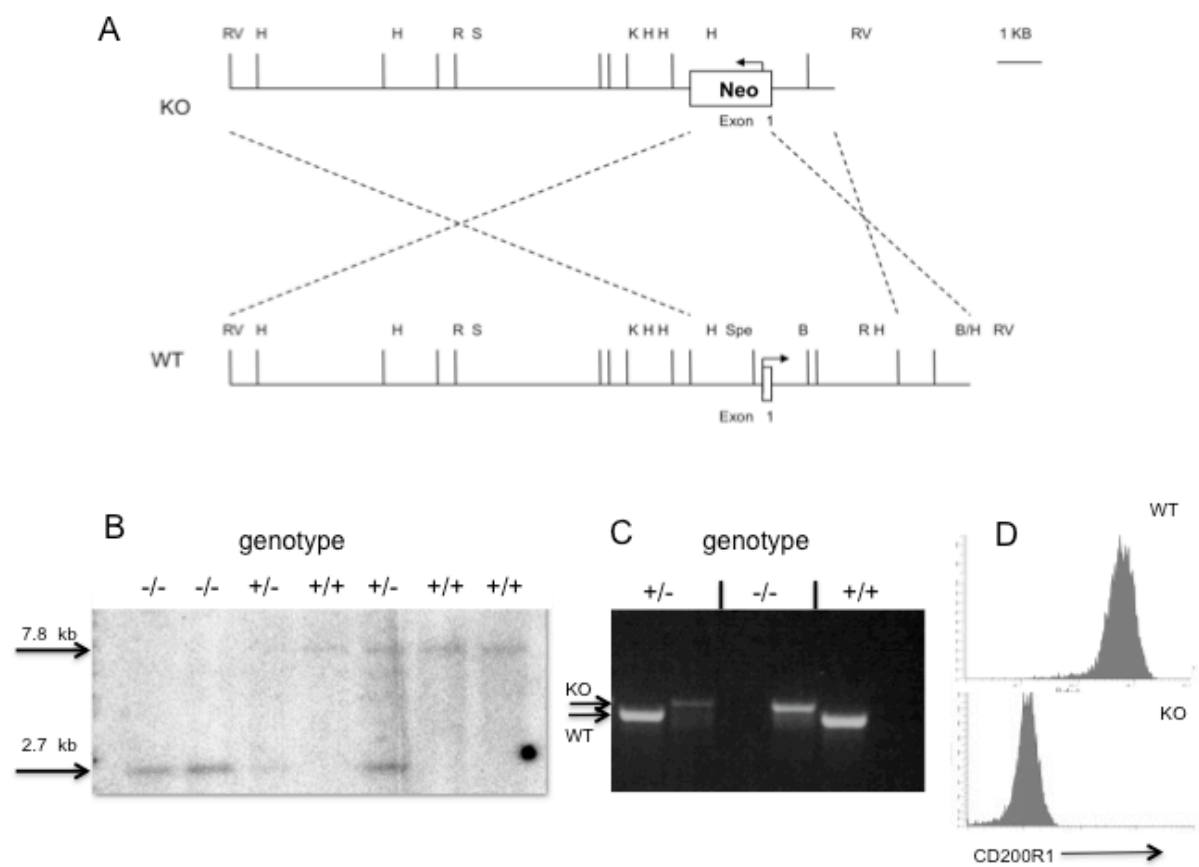

Supplement: S1 (10.1371/journal.pone.0047740.s001) [file journal.pone.0047740.s001]
